# Supplementary material for: Towards tuning the packing and entanglement of zigzag coordination chains by terminal ligands
Source: Royal Society of Chemistry journal article supplement (doi:10.1039/b715949h), 2008-01-01
Supplement: b715949h.pdf [file b715949h.pdf]

## Electronic Supplementary Information

# Towards tuning the packing and entanglement of zigzag coordination chains by terminal ligands

5  
Ai-Ling Cheng, Yu Ma, Jian-Yong Zhang, En-Qing Gao\*

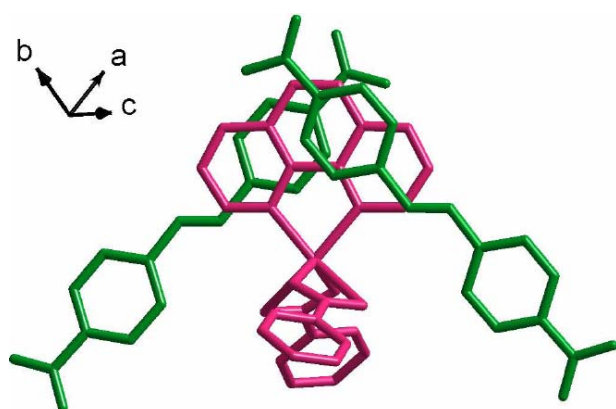

10  
**Fig. S1.** A view of the  $\pi$ - $\pi$  stacking interactions between phen and stilbene groups in **4a**

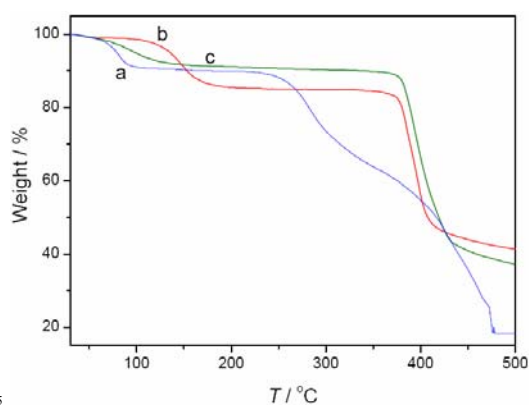

15  
**Fig. S2.** TGA analyses of **2** (a), **4a** (b) and **4b** (c) over the temperature range from 30 to 500°C

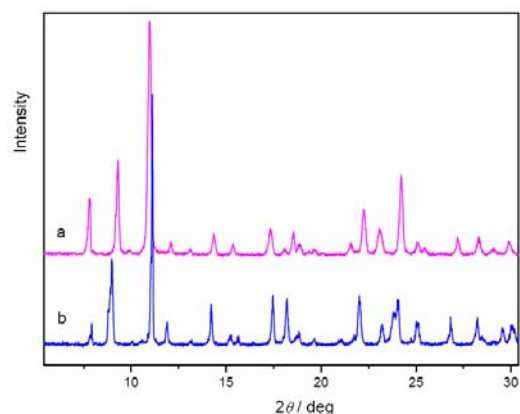

20  
**Fig. S2.** XRD pattern for (a) **4** (evacuated at 120 °C under vacuum for 24 h), and (b) **4b** (obtained by immersing **4** in DMF for 10 h)

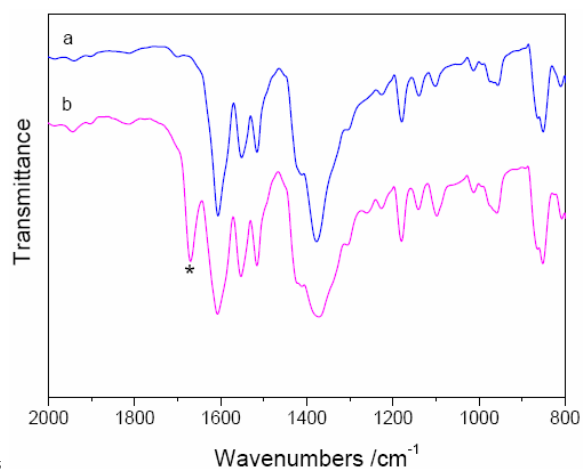

25  
**Fig. S3.** Comparison of the IR Spectra of the evacuated sample **4** (a), and the re-solvated **4b** obtained by immersing **4** in DMF for 10 h (b). The band (1669  $\text{cm}^{-1}$ ) marked with asterisk is attributable to the  $\nu(\text{C}=\text{O})$  absorption of the DMF molecules in **4b**.  
30
